1 **Title:** Respiratory virus detection and sequencing from negative SARS-CoV-2 rapid antigen tests

2

3 **Authors:**

4 Emmanuela Jules<sup>1,\*</sup>, Charlie Decker<sup>1,\*</sup>, Brianna Jeanne Bixler PhD<sup>1,2,\*</sup>, Alaa Ahmed PhD<sup>1,3</sup>,

5 Zijing (Carol) Zhou<sup>1</sup>, Itika Arora PhD<sup>1,2</sup>, Henok Tafesse MD<sup>1</sup>, Hannah Dakanay<sup>1</sup>, Andrei

6 Bombin PhD<sup>1,2</sup>, Ethan Wang<sup>1</sup>, Jessica Ingersoll<sup>1</sup>, Kathy Bifulco<sup>4</sup>, Jennifer K. Frediani PhD,

7 RD<sup>4,5</sup>, Richard Parsons<sup>4,5</sup>, Julie Sullivan<sup>5,6</sup>, Morgan Greenleaf<sup>5,7</sup>, Jesse J. Waggoner MD<sup>2</sup>, Greg

8 S. Martin MD, MSc<sup>8</sup>, Wilbur A. Lam MD, PhD<sup>6,9,10</sup>, Anne Piantadosi MD, PhD<sup>1,2,#</sup>

9

10 **Affiliations:**

11 <sup>1</sup>Department of Pathology and Laboratory Medicine; Emory University School of Medicine;

12 Atlanta, GA, 30322; USA

13 <sup>2</sup>Division of Infectious Diseases; Department of Medicine, Emory University School of

14 Medicine; Atlanta, GA, 30322; USA

15 <sup>3</sup>Emory Integrated Genomics Core; Emory University School of Medicine; Atlanta, GA, 30322;

16 USA

17 <sup>4</sup>Nell Hodgson Woodruff School of Nursing, Emory University, Atlanta, Georgia, USA

18 <sup>5</sup>The Atlanta Center for Microsystems-Engineered Point-of-Care Technologies, Atlanta, GA,

19 USA

20 <sup>6</sup>Department of Pediatrics, Emory University School of Medicine, Atlanta, GA, USA

21 <sup>7</sup>Georgia Clinical and Translational Science Alliance, Atlanta, GA

22 <sup>8</sup>Division of Pulmonary, Allergy, Critical Care Medicine and Sleep Medicine, Emory University,

23 Atlanta, GA 30303, USA

24 <sup>9</sup>Wallace H. Coulter Department of Biomedical Engineering, Georgia Institute of Technology  
25 and Emory University, Atlanta, GA, USA.

26 <sup>10</sup>Aflac Cancer and Blood Disorders Center of Children's Healthcare of Atlanta, Atlanta, GA,  
27 USA

28 \*These first authors contributed equally to this article

29

30 **# Corresponding author:**

31 Anne Piantadosi MD, PhD

32 Woodruff Memorial Research Building

33 101 Woodruff Circle

34 Atlanta GA 30322

35 404-712-9005

36 [anne.piantadosi@emory.edu](mailto:anne.piantadosi@emory.edu)

37

38 **Word count:**

39 Abstract: 45

40 Text: 1,199

41

42 **Running title:** Metagenomics from negative COVID-19 antigen tests

43

44 **Keywords:** molecular epidemiology, respiratory tract infections, public health surveillance,

45 SARS-CoV-2

46

47

48 **Abstract**

49 Genomic epidemiology offers important insight into the transmission and evolution of  
50 respiratory viruses. We used metagenomic sequencing from negative SARS-CoV-2 antigen tests  
51 to identify a wide range of respiratory viruses and generate full genome sequences, offering a  
52 streamlined mechanism for broad respiratory virus genomic surveillance.

## 53 **Introduction**

54           The SARS-CoV-2 pandemic highlighted the importance of genomic epidemiology in  
55 understanding virus transmission and evolution, informing essential countermeasures from non-  
56 pharmaceutical interventions to vaccines. Massive global efforts in SARS-CoV-2 genomic  
57 surveillance were made possible by widespread diagnostic testing and the growth of new  
58 infrastructure and methods for sequencing and analysis (1). Most genomic surveillance pipelines  
59 in the U.S. obtained residual SARS-CoV-2 positive samples from clinical, public health, and  
60 commercial laboratories. This strategy was effective during the pandemic but difficult to  
61 maintain with the rise of at-home rapid antigen tests (2, 3). As traditional sample sources  
62 declined, our group and others demonstrated that residual samples from rapid antigen tests could  
63 be used to generate and analyze full SARS-CoV-2 sequences for genomic surveillance (4-6).

64           Here, we build upon this work by identifying, sequencing, and analyzing other  
65 respiratory viruses using residual swab samples from negative BinaxNow™ COVID-19 antigen  
66 tests. This multi-virus approach is important as SARS-CoV-2 has transitioned to an endemic  
67 virus whose symptoms resemble those of other respiratory viruses (7). Thus, there is both a need  
68 for broad testing and an opportunity to expand genomic surveillance for respiratory viruses using  
69 self-collected samples.

70

## 71 **Methods**

72           Detailed laboratory and analysis methods are provided in the **Appendix**. Briefly,  
73 participants were enrolled in a parent study evaluating novel viral diagnostic tests through the  
74 RADx program at the Atlanta Center for Microsystems Engineered Point-of-Care Technologies.  
75 The study protocol was approved by the Emory Institutional Review Board and the Grady

76 Research Oversight Committee. We performed RNA metagenomic sequencing as described (8),  
77 obtaining a median of 5.8 million reads per sample (**Supplementary Data**). We used a three-step  
78 bioinformatic approach to detect viruses (**Supplementary Figure 1**) using KrakenUniq, blastn,  
79 and reference mapping, with a final criterion requiring coverage of at least 3 distinct genome  
80 regions, based on clinical diagnostic criteria for metagenomic sequencing (9).

81

## 82 **Results**

83 We collected negative BinaxNOW™ test samples from 53 individuals between April-  
84 August 2023 (**Supplementary Table 1**), a period during which 68% of the BinaxNOW™ tests in  
85 the parent study were negative. All individuals were symptomatic at the time of testing (**Table 1**),  
86 and the median interval between symptom onset and testing was 2 days (range 0-9). RT-PCR was  
87 positive for influenza B in three samples and negative for influenza A and SARS-CoV-2 in all  
88 samples (**Supplementary Data**).

89 Metagenomic sequencing identified a low level of SARS-CoV-2 in one sample and a  
90 different pathogenic human respiratory virus in 17 of the other 52 samples (33%)  
91 (**Supplementary Data**). The following viruses were detected: parainfluenza viruses (N=7),  
92 rhinoviruses (N=5), influenza B (N=3), seasonal coronaviruses (N=2), and adenovirus (N=1)  
93 (**Figure 1**). In one sample, both influenza B and parainfluenza 2 were detected. In another  
94 sample positive for influenza B by RT-PCR, metagenomic sequencing did not identify influenza  
95 but identified human mastadenovirus E. Thus, excluding SARS-CoV-2, a total of 18 viruses were  
96 detected across 17 samples. There was no difference in the total number of reads obtained for  
97 samples with and without viruses detected (Mann Whitney U test,  $p=0.29$ ).

98 We observed potential differences in symptom frequencies between individuals with and  
99 without viruses detected, but none were statistically significant (**Table 1**).

100 Of the 18 viruses detected, we generated full viral genome sequences from 11 (61%),  
101 with >90% coverage and 71-24,000 fold depth (**Supplementary Data**). These included  
102 parainfluenza 3 (4/4 samples), parainfluenza 2 (1/2), rhinovirus (5/5), and influenza B (1/3).

103 We performed phylogenetic analysis of parainfluenza 3 as a proof-of-concept for  
104 genomic epidemiology studies and found substantial diversity. Using the lineage classification  
105 system described in (10), two of our sequences clustered with Lineage A1 sequences from 2019-  
106 2023 (**Figure 2A**), another clustered with Lineage C sequences from Japan in 2023, and the  
107 fourth with Lineage C sequences from the U.S. collected between 2015-2017 (**Figure 2B**), all  
108 with high bootstrap support (**Supplementary Figure 2**). Of note, there are only about 450  
109 complete parainfluenza 3 virus sequences available; the data from our small study represent  
110 nearly 1% of this number, underscoring the opportunity to easily expand genomic surveillance  
111 using this approach.

112 In addition to human pathogenic respiratory viruses, we detected over 100 viruses of no  
113 clinical significance, including bacteriophages and plant viruses, many of which were also  
114 detected in our negative controls (**Figure 3**). Similarly, mastadenovirus C was found in many  
115 samples and negative controls. These are all consistent with environmental or reagent  
116 contaminants. Herpesviruses were found in many samples by KrakenUniq and blastn, but were  
117 not confirmed by mapping to a reference sequence with coverage of at least 3 regions. Overall,  
118 1,367 viral taxa were identified by KrakenUniq, only 254 (18.6%) were confirmed by BLAST,  
119 and only 137 (53.9% of these, 10% of total) met our criteria for detection, highlighting the  
120 importance of confirmatory steps in metagenomic analysis.

121

## 122 **Discussion**

123           Our study demonstrates that RNA metagenomic sequencing of residual swab samples  
124 from negative BinaxNOW™ tests can be used to detect a broad range of respiratory viruses,  
125 including rhinoviruses, parainfluenza viruses, influenza B, seasonal coronaviruses, and  
126 adenovirus. All of these have overlapping symptoms with one another and with SARS-CoV-2,  
127 underscoring the need for multi-virus testing approaches. Although our study was not designed  
128 for clinical diagnosis, metagenomic sequencing is increasingly used clinically, and our results  
129 illustrate the need for rigorous analysis techniques and careful interpretation.

130           It is notable that only 33% of samples had a human pathogenic respiratory virus. This is  
131 similar to our prior study detecting alternative respiratory viruses in only 40% of SARS-CoV-2  
132 negative individuals using residual clinical samples early in the pandemic (8). Possible  
133 explanations include individuals with a non-infectious syndrome, a bacterial or other non-viral  
134 infection, or a virus present at a low level. It is also possible that some individuals were infected  
135 with a DNA virus not optimally captured by RNA sequencing. However, we detected adenovirus,  
136 the most prevalent respiratory DNA virus. Among common RNA viruses, we did not detect  
137 influenza A or RSV, which we attribute to the winter-predominant seasonality of these viruses  
138 compared to our sample collection in spring and summer.

139           Importantly, of the 18 viruses detected, we were able to generate full viral genome  
140 sequences from 11 (61%) using moderate sequencing depths. Thus, the single laboratory  
141 technique of metagenomic sequencing can not only identify diverse respiratory viruses but also  
142 contribute to their genomic surveillance. The surprisingly high depth of genome coverage

143 achieved for many sequences indicates that throughput and cost can be improved by reducing  
144 total sequencing reads from each sample in future studies.

145 By combining metagenomic sequencing with the use of residual antigen test samples, we  
146 demonstrate a mechanism for convenient and broad respiratory virus surveillance. Our study  
147 used BinaxNOW™ tests, which conveniently preserve the used swab within the kit cassette;  
148 future work is needed to evaluate this approach using rapid antigen test strips themselves, as  
149 previously demonstrated for SARS-CoV-2 sequencing (5). Additionally, future studies would  
150 benefit from a regulatory framework in which results can be returned to study participants, who  
151 are likely curious about the presence of other respiratory viruses when rapid antigen testing is  
152 negative.

153 In conclusion, our study illustrates that residual samples from self-collected antigen tests  
154 can be a powerful sample source for investigating the genomic epidemiology of a broad range of  
155 respiratory viruses, building upon the strong foundations for viral surveillance established during  
156 the SARS-CoV-2 pandemic.

157

#### 158 **Data Availability:**

159 All raw sequencing data (cleaned of human reads) is available in NCBI SRA under BioProject  
160 PRJNA1144955, and assembled virus genome sequences are available in NCBI GenBank with  
161 accession numbers listed in the Supplementary Data file.

162

#### 163 **Acknowledgements:**

164 We would like to thank the study participants.

165



166 **Disclosures:**

167 All authors report no conflicts of interest to disclose.

168

169 **Funding:**

170 This work was supported by NIH U54 EB027690 02S1, U54 EB027690 03S1, U54EB027690

171 03S2 UL1 TR002378 and the Centers for Disease Control and Prevention-funded Georgia

172 Pathogen Genomics Center of Excellence contract 40500-050-23234506. This study was

173 supported in part by the Emory Integrated Genomics Core (EIGC) (RRID:SCR\_023529), which

174 is subsidized by the Emory University School of Medicine and is one of the Emory Integrated

175 Core Facilities. Additional support was provided by the Georgia Clinical & Translational Science

176 Alliance of the National Institutes of Health under Award Number UL1TR002378. The content is

177 solely the responsibility of the authors and does not necessarily reflect the official views of the

178 National Institutes of Health.

179

180 **Author bio:**

181 Ms. Jules received a Bachelor of Science in Anthropology and Human Biology from Emory

182 University and is currently a research specialist in the Department of Pathology and Laboratory

183 Medicine in the Emory University School of Medicine. She will be applying to medical school

184 with the aspiration of becoming a family doctor and expanding healthcare to underserved

185 communities.

186 **References**

- 187 1. Oude Munnink BB, Worp N, Nieuwenhuijse DF, Sikkema RS, Haagmans B, Fouchier  
188 RAM, et al. The next phase of SARS-CoV-2 surveillance: real-time molecular epidemiology. *Nat*  
189 *Med.* 2021;27(9):1518-24. Epub 20210909. doi: 10.1038/s41591-021-01472-w. PubMed PMID:  
190 34504335.
- 191 2. Ritchey MD, Rosenblum HG, Del Guercio K, Humbard M, Santos S, Hall J, et al.  
192 COVID-19 Self-Test Data: Challenges and Opportunities - United States, October 31, 2021-June  
193 11, 2022. *MMWR Morb Mortal Wkly Rep.* 2022;71(32):1005-10. Epub 20220812. doi:  
194 10.15585/mmwr.mm7132a1. PubMed PMID: 35951486; PubMed Central PMCID:  
195 PMC9400539.
- 196 3. Rader B, Gertz A, Iuliano AD, Gilmer M, Wronski L, Astley CM, et al. Use of At-Home  
197 COVID-19 Tests - United States, August 23, 2021-March 12, 2022. *MMWR Morb Mortal Wkly*  
198 *Rep.* 2022;71(13):489-94. Epub 20220401. doi: 10.15585/mmwr.mm7113e1. PubMed PMID:  
199 35358168; PubMed Central PMCID: PMC8979595.
- 200 4. Nguyen PV, Carmola LR, Wang E, Bassit L, Rao A, Greenleaf M, et al. SARS-CoV-2  
201 molecular testing and whole genome sequencing following RNA recovery from used BinaxNOW  
202 COVID-19 antigen self tests. *J Clin Virol.* 2023;162:105426. Epub 20230324. doi:  
203 10.1016/j.jcv.2023.105426. PubMed PMID: 37028004; PubMed Central PMCID:  
204 PMC10036152.
- 205 5. Martin GE, Taiaroa G, Taouk ML, Savic I, O'Keefe J, Quach R, et al. Maintaining  
206 genomic surveillance using whole-genome sequencing of SARS-CoV-2 from rapid antigen test  
207 devices. *Lancet Infect Dis.* 2022;22(10):1417-8. Epub 20220804. doi: 10.1016/S1473-  
208 3099(22)00512-6. PubMed PMID: 35934015; PubMed Central PMCID: PMC9352270.

- 209 6. Hassouneh SA, Trujillo A, Ali S, Cella E, Johnston C, DeRuff KC, et al. Antigen test  
210 swabs are comparable to nasopharyngeal swabs for sequencing of SARS-CoV-2. *Sci Rep.*  
211 2023;13(1):11255. Epub 20230712. doi: 10.1038/s41598-023-37893-5. PubMed PMID:  
212 37438412; PubMed Central PMCID: PMC10338537.
- 213 7. Geismar C, Nguyen V, Fragaszy E, Shrotri M, Navaratnam AMD, Beale S, et al.  
214 Symptom profiles of community cases infected by influenza, RSV, rhinovirus, seasonal  
215 coronavirus, and SARS-CoV-2 variants of concern. *Sci Rep.* 2023;13(1):12511. Epub 20230802.  
216 doi: 10.1038/s41598-023-38869-1. PubMed PMID: 37532756; PubMed Central PMCID:  
217 PMC10397315.
- 218 8. Babiker A, Bradley HL, Stittleburg VD, Ingersoll JM, Key A, Kraft CS, et al.  
219 Metagenomic Sequencing To Detect Respiratory Viruses in Persons under Investigation for  
220 COVID-19. *J Clin Microbiol.* 2020;59(1). Epub 20201217. doi: 10.1128/JCM.02142-20.  
221 PubMed PMID: 33067271; PubMed Central PMCID: PMC7771462.
- 222 9. Miller S, Naccache SN, Samayoa E, Messacar K, Arevalo S, Federman S, et al.  
223 Laboratory validation of a clinical metagenomic sequencing assay for pathogen detection in  
224 cerebrospinal fluid. *Genome Res.* 2019;29(5):831-42. Epub 20190416. doi:  
225 10.1101/gr.238170.118. PubMed PMID: 30992304; PubMed Central PMCID: PMC6499319.
- 226 10. Lee K, Park K, Sung H, Kim MN. Phylogenetic lineage dynamics of global parainfluenza  
227 virus type 3 post-COVID-19 pandemic. *mSphere.* 2024;9(4):e0062423. Epub 20240319. doi:  
228 10.1128/msphere.00624-23. PubMed PMID: 38501829; PubMed Central PMCID:  
229 PMC11036794.

231 **Tables:**

232

233 **Table 1: Participant symptoms.** Table indicates the number and percent of participants

234 reporting each symptom at the time of testing. For symptom categories (gray rows), the number

235 of participants with at least one symptom in that category is reported. \*This includes one

236 individual with SARS-CoV-2 detected at a low level and 17 individuals with an alternative

237 human pathogenic respiratory virus detected.

| Symptom                            | Total participants<br>(N = 53) | Participants with a<br>virus detected<br>(N = 18*) | Participants with no<br>virus detected<br>(N = 35) |
|------------------------------------|--------------------------------|----------------------------------------------------|----------------------------------------------------|
| <b>Upper Respiratory</b>           | 47 (88.7%)                     | 17 (94.4%)                                         | 30 (85.7%)                                         |
| Congestion/runny nose              | 37 (69.8%)                     | 15 (83.3%)                                         | 22 (62.9%)                                         |
| Sore throat                        | 33 (62.3%)                     | 14 (77.8%)                                         | 19 (54.3%)                                         |
| Loss of sense of taste or<br>smell | 7 (13.2%)                      | 2 (11.1%)                                          | 5 (14.3%)                                          |
| <b>Lower Respiratory</b>           | 43 (81.1%)                     | 15 (83.3%)                                         | 28 (80.0%)                                         |
| Cough                              | 39 (73.6%)                     | 15 (83.3%)                                         | 24 (68.6%)                                         |
| Shortness of breath                | 23 (43.4%)                     | 6 (33.3%)                                          | 17 (48.6%)                                         |
| <b>Gastrointestinal</b>            | 15 (28.3%)                     | 6 (33.3%)                                          | 9 (25.7%)                                          |
| Vomiting                           | 4 (7.6%)                       | 3 (16.7%)                                          | 1 (2.9%)                                           |
| Nausea                             | 11 (20.8%)                     | 2 (11.1%)                                          | 9 (25.7%)                                          |
| Diarrhea                           | 2 (3.8%)                       | 1 (5.6%)                                           | 1 (2.9%)                                           |
| Abdominal pain                     | 7 (13.2%)                      | 2 (11.1%)                                          | 5 (14.3%)                                          |
| <b>Systemic</b>                    | 35 (66.0%)                     | 13 (72.2%)                                         | 22 (62.9%)                                         |
| Fever (>100.4)                     | 18 (34.0%)                     | 7 (38.9%)                                          | 11 (31.4%)                                         |
| Chills                             | 24 (45.3%)                     | 11 (61.1%)                                         | 13 (37.1%)                                         |
| Fatigue                            | 27 (50.9%)                     | 11 (61.1%)                                         | 16 (45.71%)                                        |
| <b>Other</b>                       | 41 (77.4%)                     | 16 (88.9%)                                         | 25 (71.4%)                                         |
| Headache                           | 30 (56.6%)                     | 13 (72.2%)                                         | 17 (48.6%)                                         |
| Joint pain                         | 14 (26.4%)                     | 3 (16.7%)                                          | 11 (31.4%)                                         |
| Muscle pain                        | 31 (58.5%)                     | 10 (55.6%)                                         | 21 (60.0%)                                         |

238

239 **Figures:**

240

241 **Figure 1: Frequency of human pathogenic respiratory viruses found in 53 residual samples**

242 **from BinaxNOW™ tests that were negative for SARS-CoV-2.** Pie charts indicate the number

243 of samples positive for each virus among all samples (left panel) and among the 18 positive

244 samples (right panel). Numbers indicate the number of samples with a virus identified, followed

245 in parentheses by the number of samples with a >90% complete genome sequence assembled.

246

247 **Figure 2: Phylogenetic analysis of parainfluenza 3 virus sequences.** The names of sequences

248 obtained in this study are bold and in red, and reference sequences are in black. The outer ring

249 indicates virus lineage: **A)** contains representative lineage A1 sequences, and **B)** contains

250 representative sequences from lineages C, E, F, and G. Each tree is a maximized parsimony

251 subtree using down sampled data from the full analysis in **Supplementary Figure 2**, for ease of

252 visualization.

253

254 **Figure 3: Plot of the viral taxa (rows) that were detected in each sample (columns).** Blue

255 boxes indicate viruses that were detected by both KrakenUniq and blastn but not confirmed by

256 reference mapping, while red boxes indicate viruses that were detected by both KrakenUniq and

257 blastn and were confirmed by reference mapping (covering at least 3 distinct regions of the

258 reference virus genome).

259

260 **Supplementary Figure 1: Analysis pipeline for metagenomic classification and**

261 **confirmation.** Red boxes describe processing and quality control steps, yellow boxes describe

262 initial metagenomic classification using KrakenUniq, green boxes describe blastn confirmation

263 of reads classified as viral by KrakenUniq, and blue boxes describe reference-based mapping for  
264 final confirmation. LCA = lowest common ancestor.

265

266 **Supplementary Figure 2: Maximum likelihood phylogenetic analysis of parainfluenza 3**

267 **virus sequences.** The names of sequences obtained in this study are bold and in red, and

268 reference sequences in black represent all unique full-length genome sequences of parainfluenza

269 3 available in GenBank (7/30/24). Circles indicate nodes with >95% ultrafast bootstrap support.

270 The outer ring indicates virus lineage.

All samples

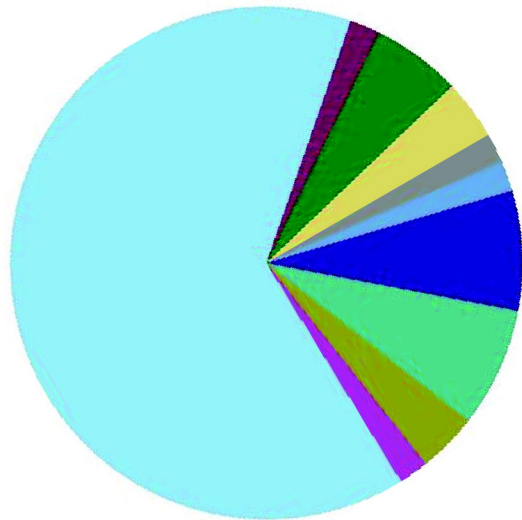

Virus-positive samples

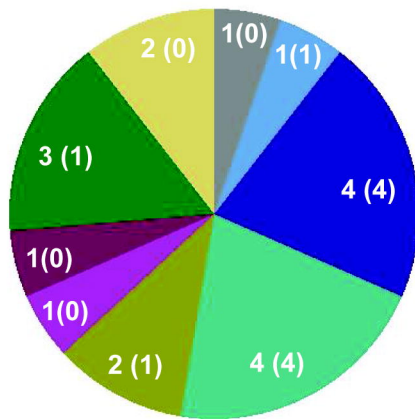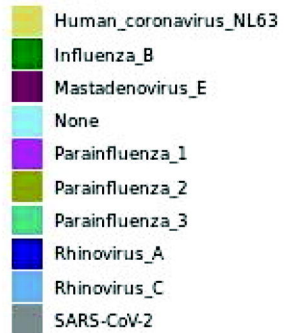

Tree scale: 100

**Lineage**

A1

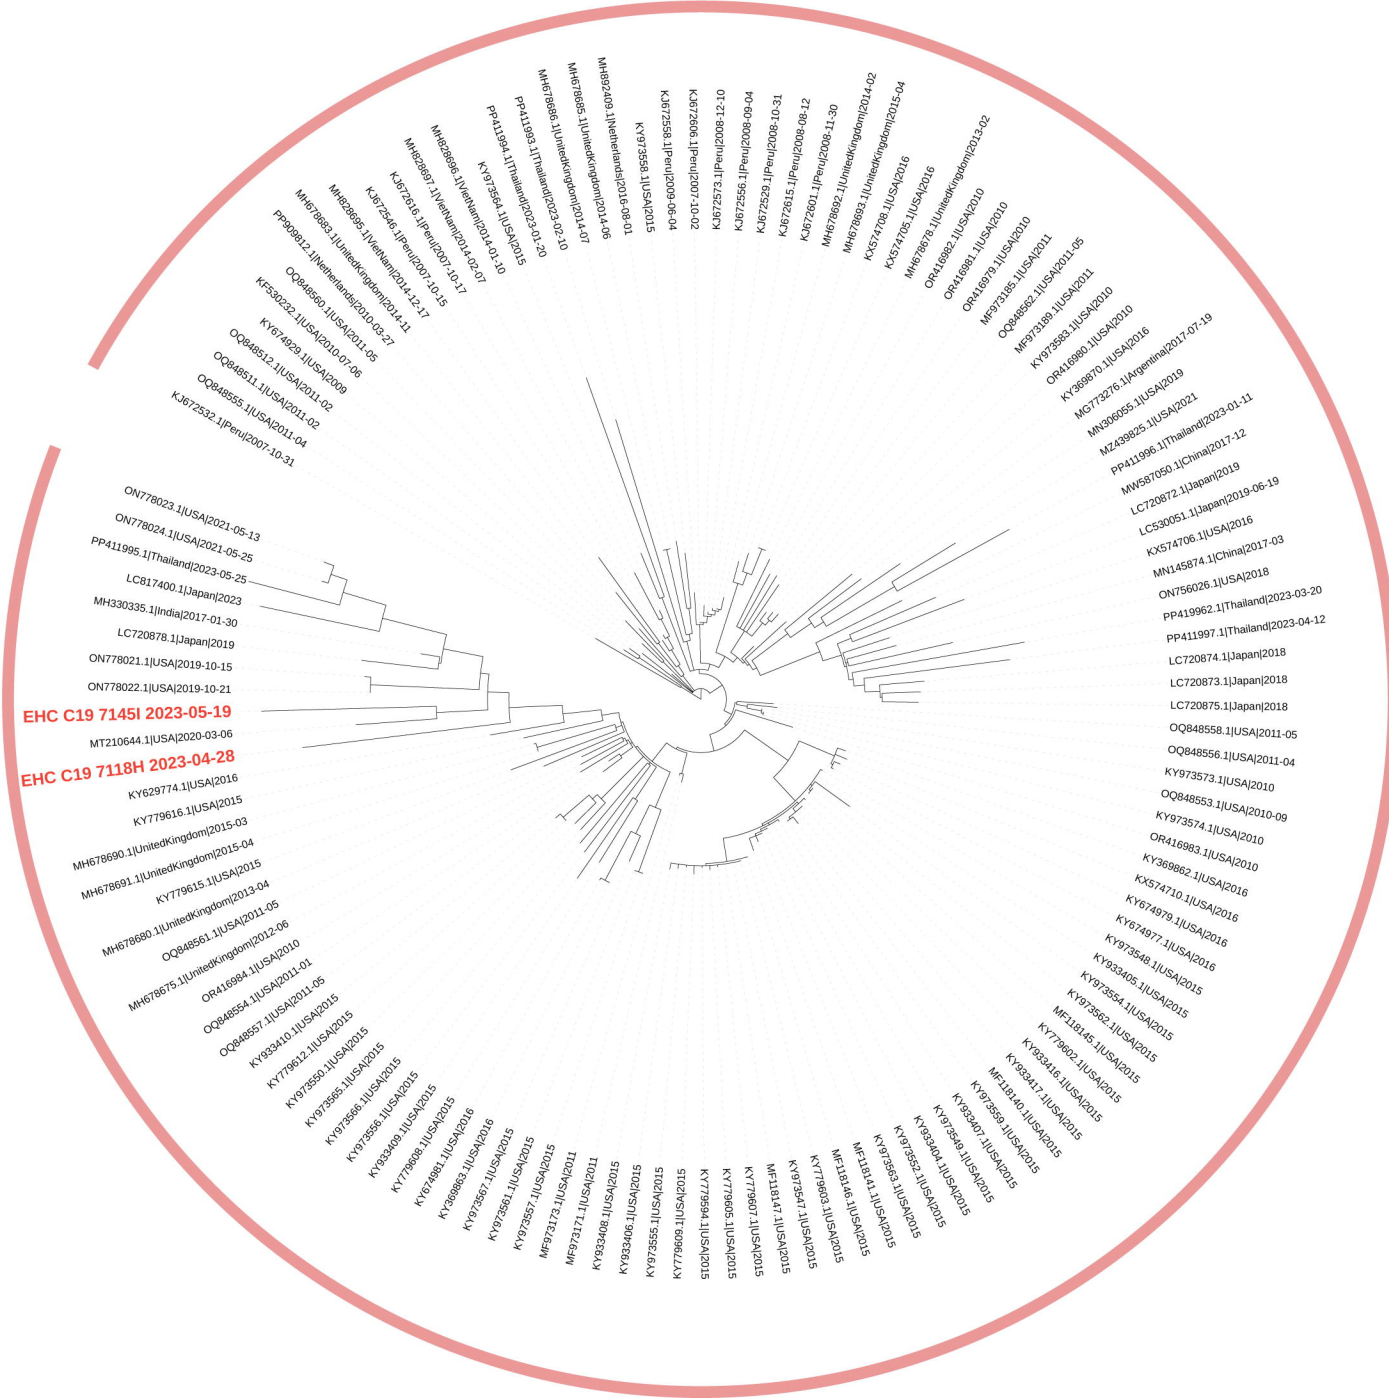



Tree scale: 100

**Lineage**

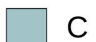

C

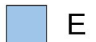

E

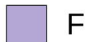

F

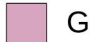

G

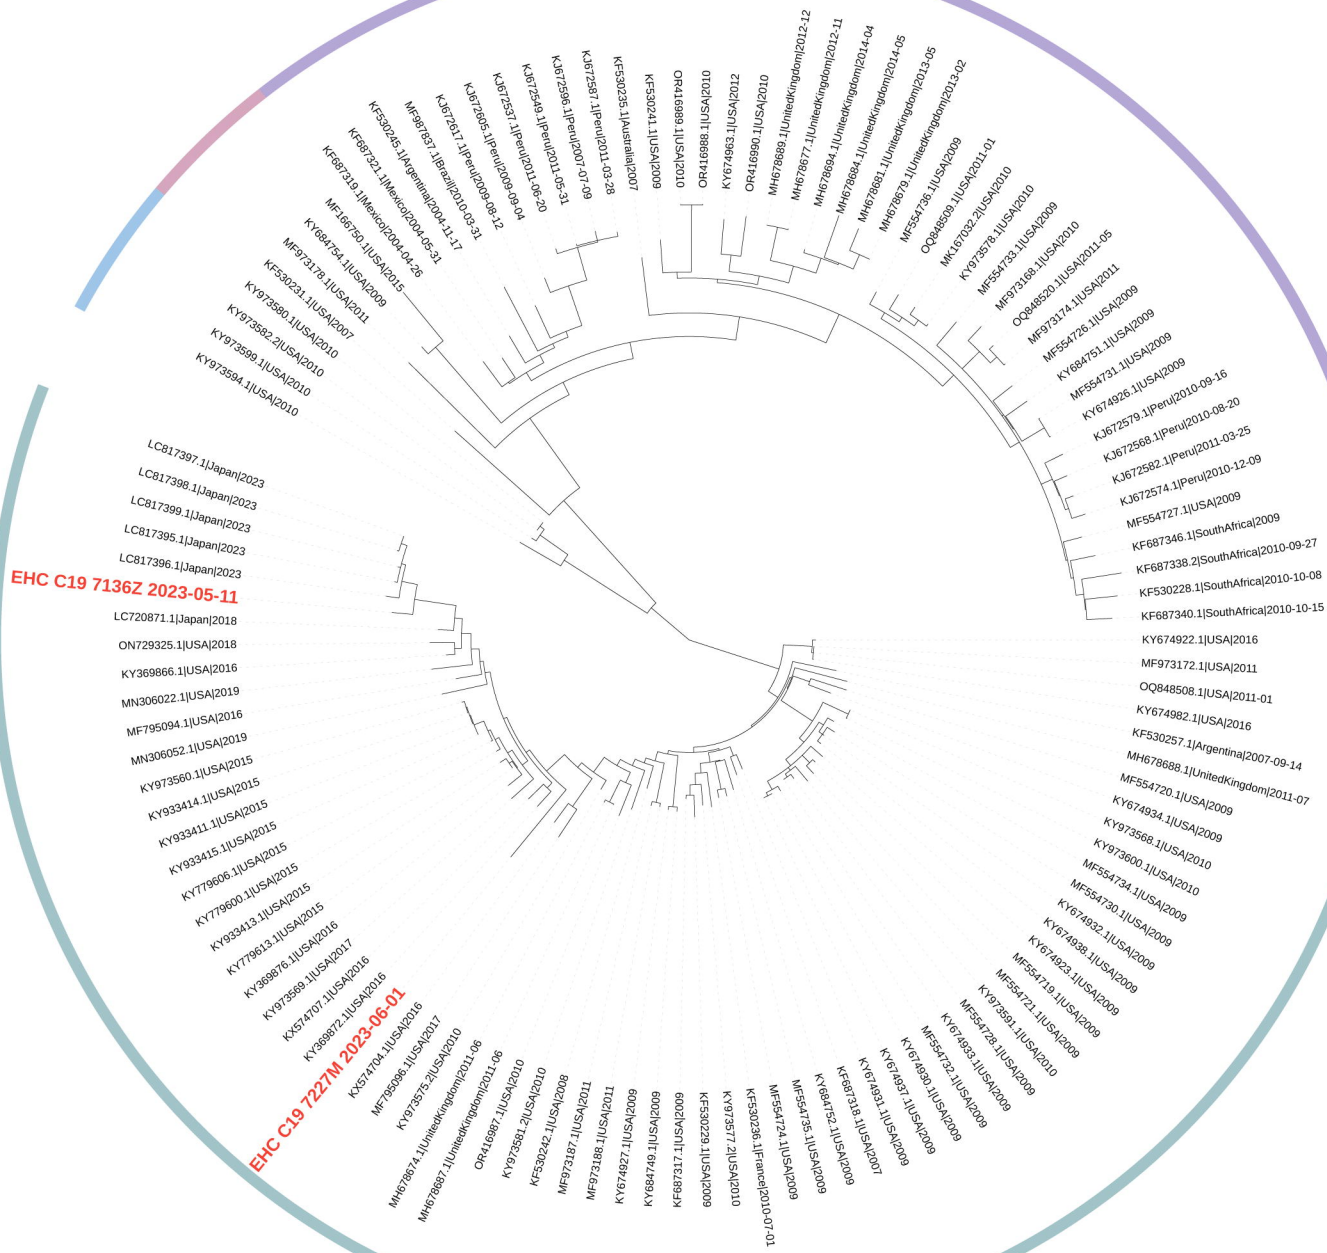

# Eukaryotic viruses

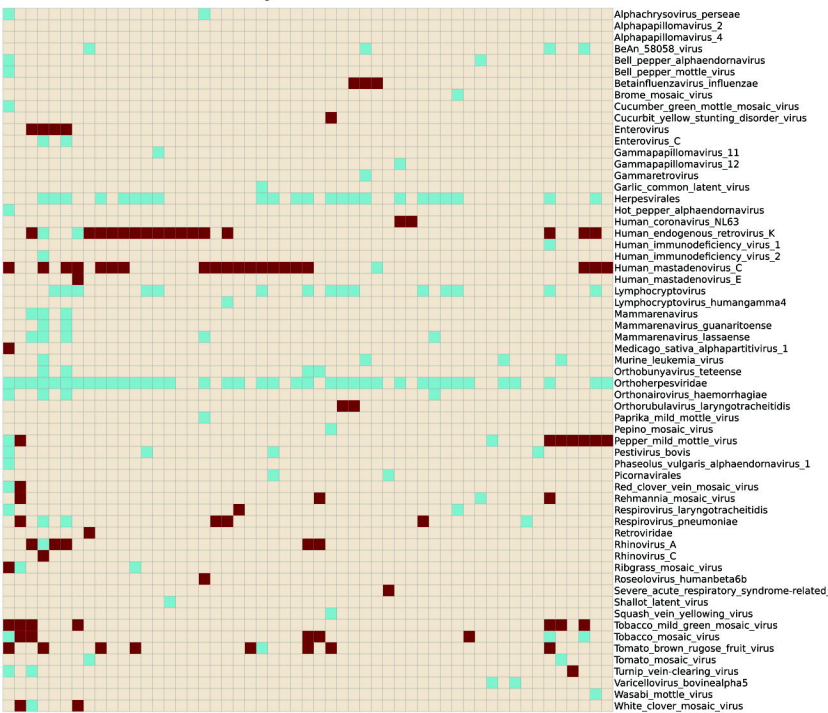

**Legend**  
■ Confirmed  
■ Not confirmed

# Negative controls

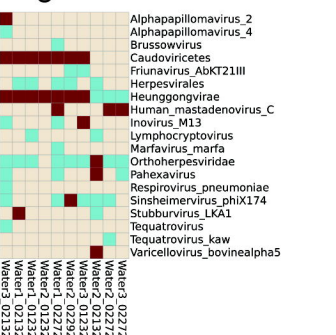

# Bacteriophages

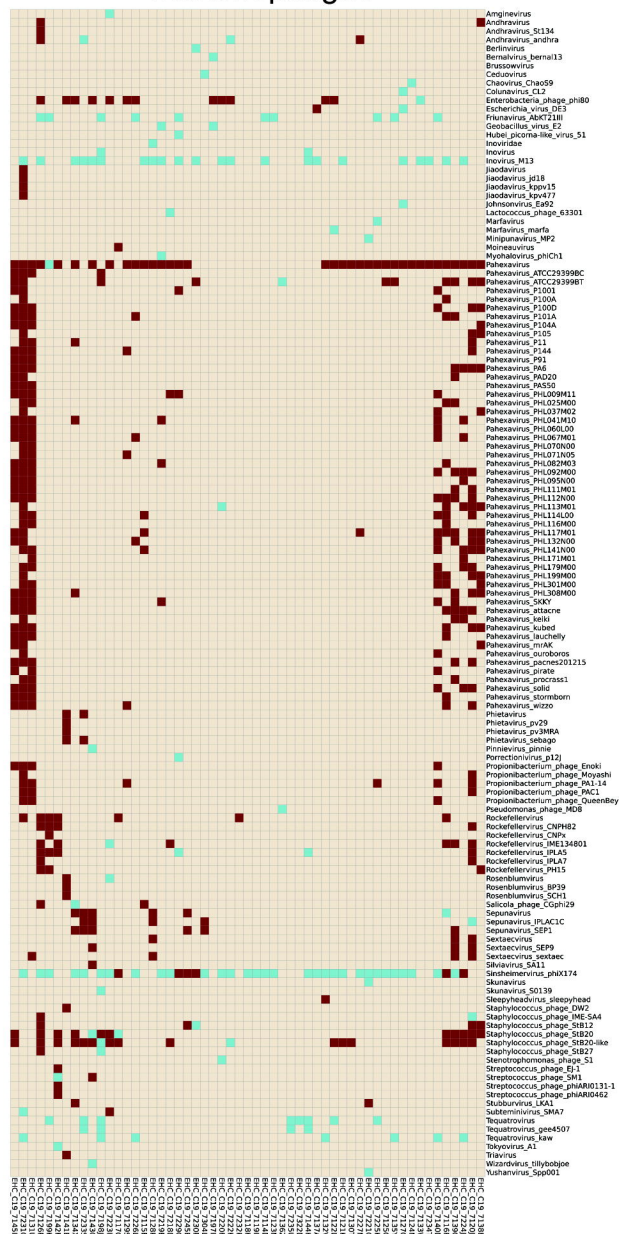

Source: https://medrxiv.org/content/10.1101/2024.08.19.24311993v1.full.pdf
